# Supplementary material for: Diagnostic yield of EUS-guided through-the-needle microforceps biopsy versus EUS-FNA of pancreatic cystic lesions: a systematic review and meta-analysis
Source: PubMed Central journal article supplement — Endosc Int Open. 2020 Apr 17;8(5):E656–67. doi: 10.1055/a-1119-6543 (PMC7164999; doi:10.1055/a-1119-6543), 2020-04-17
Supplement: 1753supmat-10-1055-a-1119-6543.pdf [file 1753supmat-10-1055-a-1119-6543.pdf]

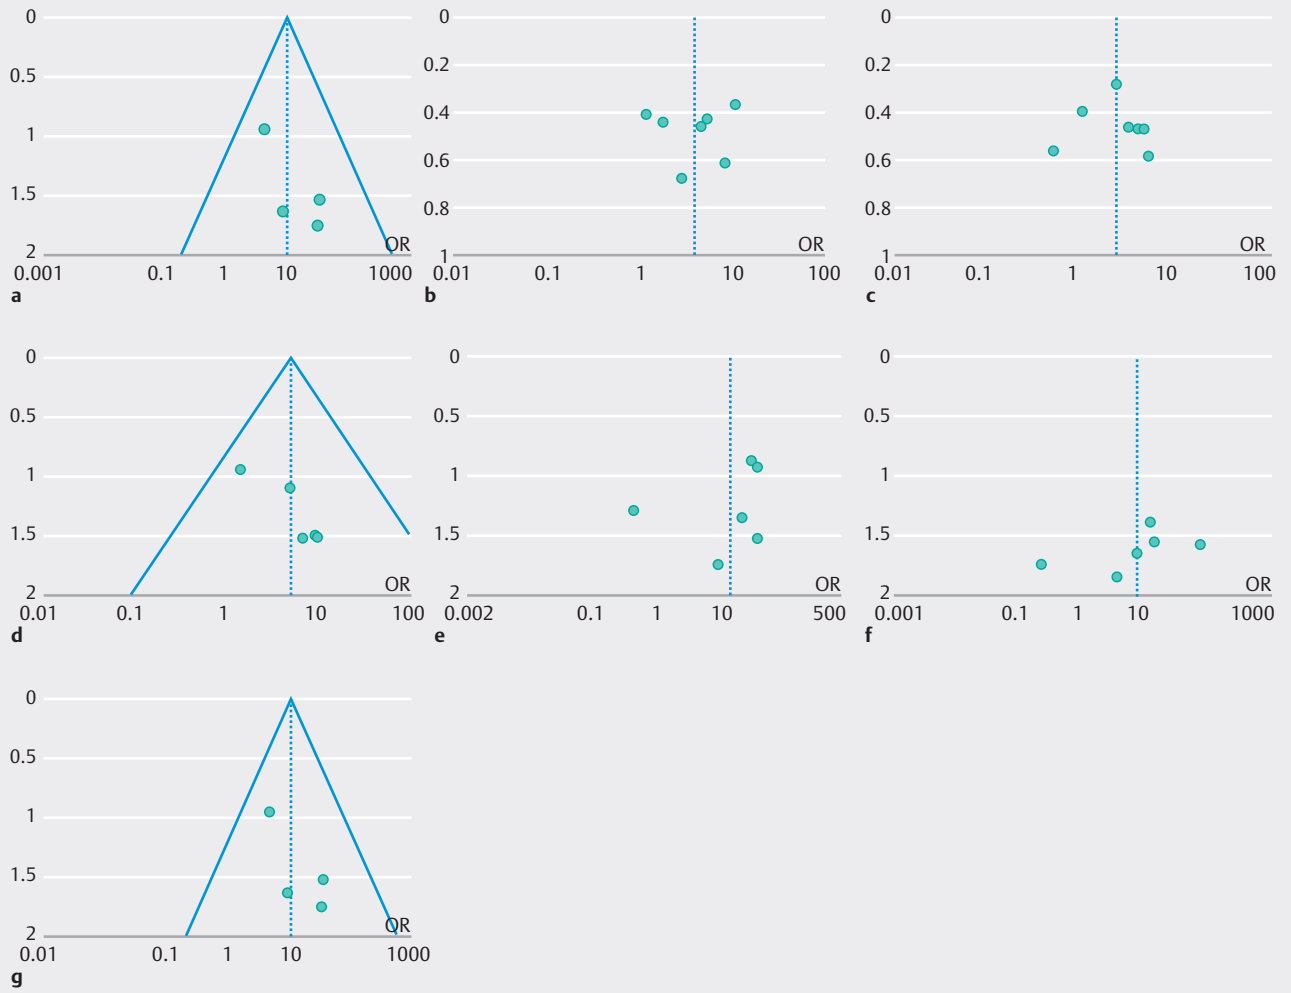

► **Supplementary Fig. 9** Funnel plots for studies. **a** Diagnostic yield of TTNB histology vs FNA cytology for a specific cyst diagnosis. **b** Diagnostic yield of TTNB histology vs FNA cytology for mucinous cysts. **c** Diagnostic yield of TTNB histology vs CEA  $\geq$  192 ng/mL for mucinous cysts. **d** TTNB histology vs FNA cytology for serous cystadenoma. **e** Concordance of TTNB histology vs FNA cytology with surgical pathology for a specific cyst type. **f** Concordance of TTNB histology vs FNA cytology with surgical pathology for a mucinous cyst. **g** Concordance of TTNB histology vs FNA cytology with histological severity on surgical pathology for a mucinous cyst.
